# Supplementary material for: Acacia senegal gum attenuates systemic toxicity in CCl4-intoxicated rats via regulation of the ROS/NF-κB signaling pathway
Source: PubMed Central journal article supplement (PMC8514504; doi:10.1038/s41598-021-99953-y), 2021-10-13
Supplement: 41598_2021_99953_MOESM1_ESM.pdf [file 41598_2021_99953_MOESM1_ESM.pdf]

## Supplementary Figure legend

**Supplementary Fig. 1: Evaluation of the ASE therapeutic influence in the studied organs using heatmap plots.** The heatmaps clustered the studied oxidative stress and necroinflammation parameters in the liver, brain, lung, and spleen tissues of the rats in the CCl<sub>4</sub>-ASE group. Results are revealed as percentage change values in comparison to the CCl<sub>4</sub> group. **(A)** Heatmap distribution of the up-regulated parameters in the CCl<sub>4</sub>-ASE group relative to the CCl<sub>4</sub> group. **(B)** Heatmap distribution of the down-regulated parameters in the CCl<sub>4</sub>-ASE group relative to the CCl<sub>4</sub> group. The dark orange color refers to the higher percentage increase values and the light color indicates the lower ones. **COX-2**, cyclooxygenase-2; **GPX**, glutathione peroxidase; **GSH**, reduced glutathione; **iNOS**, inducible nitric oxide synthase; **MPO**, myeloperoxidase; **NF-κB**, nuclear factor-kappa B; **NO**, nitric oxide; **ROS**, reactive oxygen species; **SOD**, superoxide dismutase; **TAC**, total antioxidant capacity; **TBARS**, thiobarbituric acid reactive substances; **TNF-α**, tumor necrosis factor-α.
