# Supplementary material for: Acacia senegal gum attenuates systemic toxicity in CCl4-intoxicated rats via regulation of the ROS/NF-κB signaling pathway
Source: PubMed Central journal article supplement (PMC8514504; doi:10.1038/s41598-021-99953-y), 2021-10-13
Supplement: 41598_2021_99953_MOESM2_ESM.pdf [file 41598_2021_99953_MOESM2_ESM.pdf]

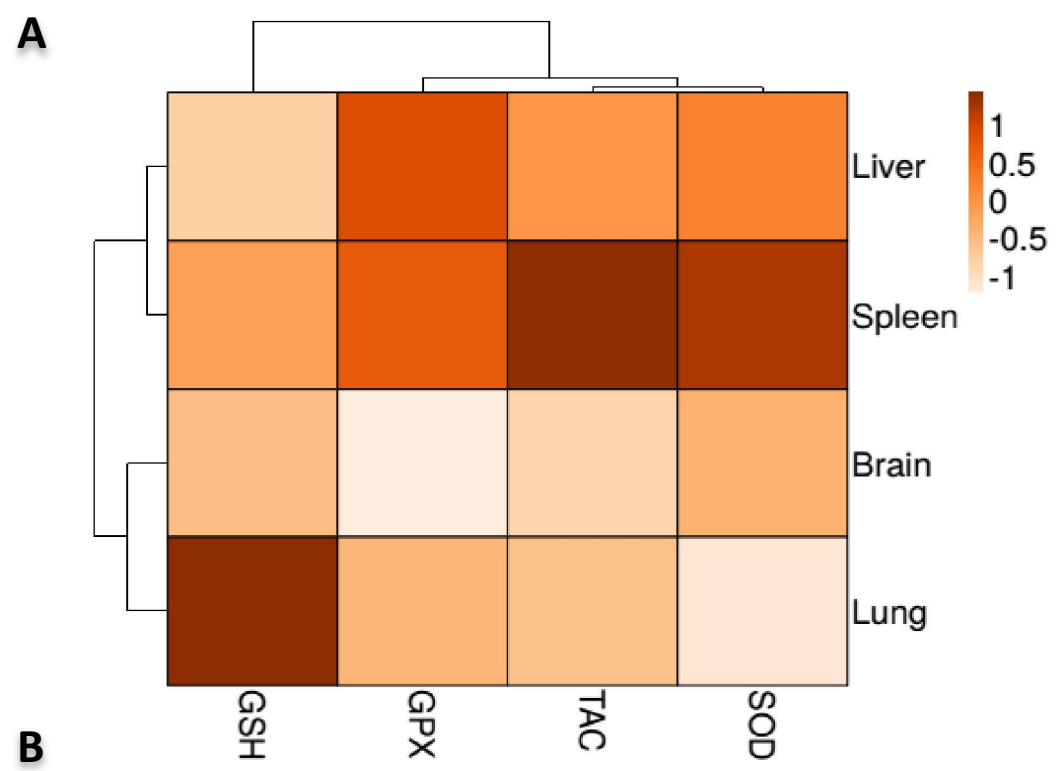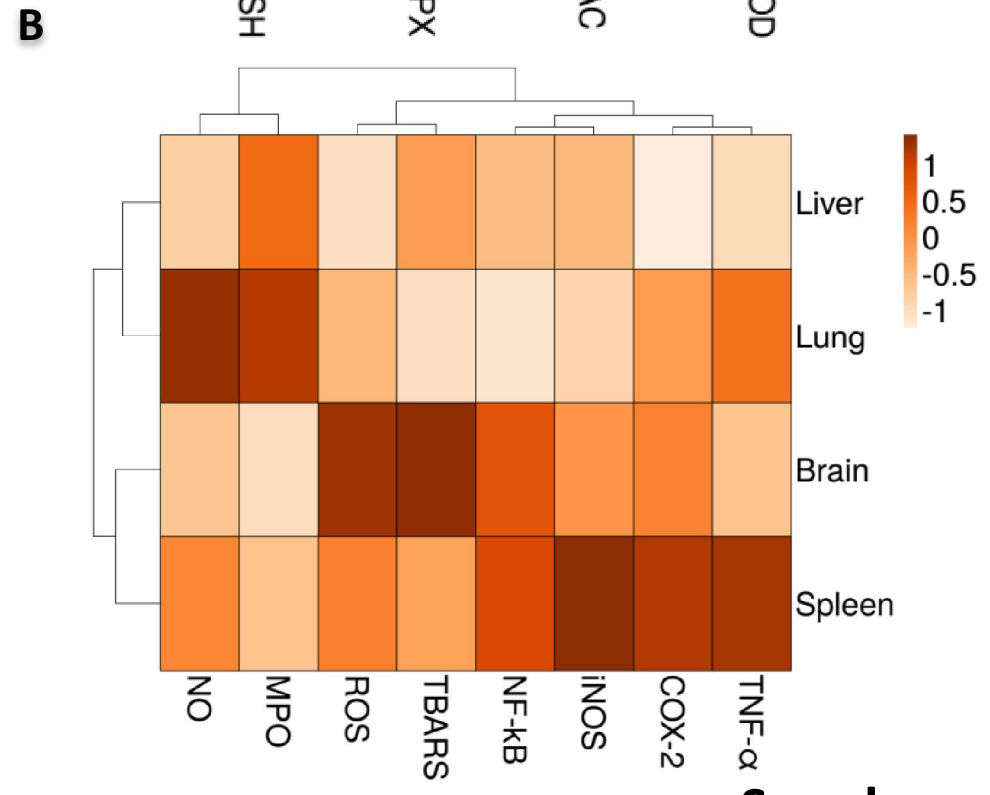

**Supplementary Figure 1**
